# Supplementary material for: Macrophages induce differentiation of plasma cells through CXCL10/IP-10
Source: PubMed Central journal article supplement — J Exp Med. 2012 Sep 24;209(10):1813–23. doi: 10.1084/jem.20112142 (PMC3457728; doi:10.1084/jem.20112142), 2012-09-24
Supplement: supp_jem.20112142_JEM_20112142_sm.pdf [file supp_jem.20112142_JEM_20112142_sm.pdf]

## SUPPLEMENTAL MATERIAL

Xu et al., <http://www.jem.org/cgi/content/full/jem.20112142/DC1>

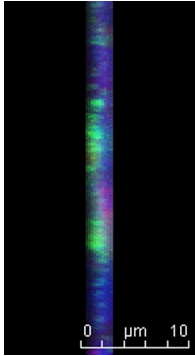

**Video 1. Close localization of CD163<sup>+</sup> Mφs and CD138<sup>+</sup> PCs.** A three-dimensional video clip performed by confocal microscopy shows that CD163<sup>+</sup> Mφs reside close to CD138<sup>+</sup> PCs on a tonsil section. Red indicates CD138-AF568, and green indicates CD163-FITC.

**Table S1.** List of phosphoflow Abs

| No. | Name of the Abs             | Vendor                    |
|-----|-----------------------------|---------------------------|
| 1   | Btk (pY551) and Itk (pY511) | BD                        |
| 2   | CREB (pS133)/ATF-1 (pS63)   | BD                        |
| 3   | IRF-7 (pS477/pS479)         | BD                        |
| 4   | Lck (pY505)                 | BD                        |
| 5   | NF- $\kappa$ B p65 (pS529)  | BD                        |
| 6   | PLC- $\gamma$ 1 (pY783)     | BD                        |
| 7   | PLC- $\gamma$ 2 (pY759)     | BD                        |
| 8   | p38 MAPK (pT180/pY182)      | BD                        |
| 9   | $\beta$ -Catenin (pS45)     | BD                        |
| 10  | SHP2 (pY542)                | BD                        |
| 11  | Src (pY418)                 | BD                        |
| 12  | SLP-76(pY128)               | BD                        |
| 13  | S6 (PS235/PS236)            | BD                        |
| 14  | Stat1 (pY701)               | BD                        |
| 15  | Stat1 (pS727)               | BD                        |
| 16  | Stat3 (pY705)               | BD                        |
| 17  | Stat3 (pS727)               | BD                        |
| 18  | Stat4 (pY693)               | BD                        |
| 19  | Stat5 (pY694)               | BD                        |
| 20  | Stat6 (pY641)               | BD                        |
| 21  | 4EBP1                       | BD                        |
| 22  | p53 (acK382)                | BD                        |
| 23  | p53 (pS37)                  | BD                        |
| 24  | p120 Catenin (pS879)        | BD                        |
| 25  | p120 Catenin (pT916)        | BD                        |
| 26  | p120 Catenin (pT310)        | BD                        |
| 27  | Rb (pS780)                  | BD                        |
| 28  | Rb (pS807/pS811)            | BD                        |
| 29  | Elk-1 (pS383)               | BD                        |
| 30  | PLK1 (pT210)                | BD                        |
| 31  | Histone H3 (pS28)           | BD                        |
| 32  | BLNK (pY84)                 | BD                        |
| 33  | PKA RII $\beta$ (pS114)     | BD                        |
| 34  | Zap70 (pY292)               | BD                        |
| 35  | c-Cbl(Y770)                 | BD                        |
| 36  | CrkL (pY207)                | BD                        |
| 37  | Ezrin (pY353)               | BD                        |
| 38  | FAK (pS910)                 | BD                        |
| 39  | p130Cas (pY249)             | BD                        |
| 40  | Pyk2 (pY402)                | BD                        |
| 41  | JNK (BD)                    | BD                        |
| 42  | Akt (S473) (CST)            | Cell Signaling Technology |
| 43  | Zap70/Syk (CST)             | Cell Signaling Technology |
| 44  | ERK (CST)                   | Cell Signaling Technology |
| 45  | c-Jun (Ser63) II            | Cell Signaling Technology |
| 46  | c-Fos                       | Cell Signaling Technology |
| 47  | ATF2                        | Cell Signaling Technology |
| 48  | RelB                        | Cell Signaling Technology |
| 49  | GSK3b                       | Cell Signaling Technology |
| 50  | Akt T308 (CST)              | Cell Signaling Technology |
| 51  | Smad1/Smad5/Smad8           | Cell Signaling Technology |
| 52  | Smad2/Smad3                 | Cell Signaling Technology |

**Table S1.** List of phosphoflow Abs (*Continued*)

| No. | Name of the Abs     | Vendor                    |
|-----|---------------------|---------------------------|
| 53  | Smad1/Smad5         | Cell Signaling Technology |
| 54  | p63 (Ser160/162) Ab | Cell Signaling Technology |
| 55  | 53BP1 (Ser1778)     | Cell Signaling Technology |
| 56  | AML1 (Ser249)       | Cell Signaling Technology |
| 57  | SirT1 (Ser47)       | Cell Signaling Technology |
